# Supplementary material for: Bivalve-specific gene expansion in the pearl oyster genome: implications of adaptation to a sessile lifestyle
Source: PubMed Central journal article supplement (PMC4759782; doi:10.1186/s40851-016-0039-2), 2016-02-18
Supplement: 40851_2016_39_MOESM1_ESM.pdf [file 40851_2016_39_MOESM1_ESM.pdf]

Table S1. Summary of *Pinctada fucata* genome sequence data.

| Sequencer | Library          | Total sequences (Gbp) | Number of reads (million) | Average read length (bp) | Estimated coverage depth |
|-----------|------------------|-----------------------|---------------------------|--------------------------|--------------------------|
| 454       | shotgun          | 15.2                  | 44.5                      | 341                      | 16x                      |
|           | 4kb paired-end   | 1.1                   | 3.8                       | 286                      |                          |
|           | 10kb paired-end  | 2.4                   | 7.8                       | 309                      |                          |
| GAIIx     | Shotgun          | 3.9                   | 76                        | 50                       | 126x                     |
|           | 1kb paired-end   | 117.4                 | 783                       | 150                      |                          |
|           | 3kb mate-pair    | 10.9                  | 216                       | 50                       |                          |
|           | 10kb mate-pair   | 11.9                  | 238                       | 50                       |                          |
| Miseq     | 700pb paired-end | 58.3                  | 227.6                     | 250                      | 51x                      |

New DNA libraries prepared for the present study are shaded in gray.

Table S2. Summary of the *P. fucata* genome assemblies.

| Version                            | ver 1.0<br>(Takeuchi <i>et al.</i> 2012) <sup>[17]</sup> | ver. 2.0 (This study)                         |                                                 |                      | -          | -         |
|------------------------------------|----------------------------------------------------------|-----------------------------------------------|-------------------------------------------------|----------------------|------------|-----------|
|                                    |                                                          | Newbler + SSPACE + GapCloser                  |                                                 |                      |            |           |
| Software                           | Newbler + SSPACE                                         | before<br>redundancy<br>removal of<br>contigs | after<br>redundancy<br>removal &<br>scaffolding | after<br>gap closure | SOAPdenovo | Platanus  |
| <b>Contigs</b>                     |                                                          |                                               |                                                 |                      |            |           |
| Number of all contigs              | 1085563                                                  | 512705                                        | 183966                                          | 77192                | 5422904    | 6903171   |
| Number of short contigs (< 1kb)    | 765607                                                   | 194080                                        | 27925                                           | 7931                 | 5196356    | 6600868   |
| Number of long contigs (> 10kb)    | 1223                                                     | 3556                                          | 12828                                           | 23075                | 44         | 688       |
| Total length of sequences (Mb)     | 1024Mb                                                   | 988Mb                                         | 712Mb                                           | 760Mb                | 1551Mb     | 1811Mb    |
| Contig length N50 (kb)             | 1.6kb                                                    | 2.7kb                                         | 6.0kb                                           | 21.3kb               | 391bp      | 422bp     |
| <b>Scaffolds</b>                   |                                                          |                                               |                                                 |                      |            |           |
| Number of scaffolds                | 800982                                                   | -                                             | 29306                                           | 29306                | 3971774    | 4413364   |
| Number of short scaffolds (< 1kb)  | 657943                                                   | -                                             | 6115                                            | 6115                 | 3578328    | 4277817   |
| Number of long scaffolds (> 100kb) | 629                                                      | -                                             | 2388                                            | 2377                 | 14809      | 1401      |
| Total length of sequences (Mb)     | 1413Mb                                                   | -                                             | 817Mb                                           | 815Mb                | 12492Mb    | 1589Mb    |
| Total gap length (Mb)              | 387Mb                                                    | -                                             | 106Mb                                           | 55Mb                 | 11032Mb    | 108330911 |
| Scaffold length N50 (kb)           | 14.5kb                                                   | -                                             | 167.4kb                                         | 167.0kb              | 47.3kb     | 1.3kb     |
| Longest (bp)                       | 698791bp                                                 | -                                             | 1168043bp                                       | 1158730bp            | 434282bp   | 637412bp  |

Table S3. Numbers of genes containing functional domains related to heat shock proteins. See also Figure 3a.

| Pfam<br>accession | Pfam family<br>identifier | <i>Pinctada</i><br><i>fucata</i> | <i>Crassostrea</i><br><i>gigas</i> | <i>Lottia</i><br><i>gigantea</i> | <i>Helobdella</i><br><i>robusta</i> | <i>Capitella</i><br><i>teleta</i> | <i>Drosophila</i><br><i>melanogaster</i> | <i>Daphnia</i><br><i>pulex</i> | <i>Caenorhabditis</i><br><i>elegans</i> | <i>Strongylocentrotus</i><br><i>purpuratus</i> | <i>Branchiostoma</i><br><i>floridae</i> | <i>Homo</i><br><i>sapiens</i> | <i>Hydra</i><br><i>magnipapillata</i> | <i>Nematostella</i><br><i>vectensis</i> | <i>Acropora</i><br><i>digitifera</i> | <i>Amphimedon</i><br><i>queenslandica</i> |
|-------------------|---------------------------|----------------------------------|------------------------------------|----------------------------------|-------------------------------------|-----------------------------------|------------------------------------------|--------------------------------|-----------------------------------------|------------------------------------------------|-----------------------------------------|-------------------------------|---------------------------------------|-----------------------------------------|--------------------------------------|-------------------------------------------|
| PF00011           | HSP20                     | 13                               | 19                                 | 10                               | 16                                  | 33                                | 11                                       | 10                             | 23                                      | 4                                              | 7                                       | 10                            | 16                                    | 20                                      | 3                                    | 0                                         |
| PF00118           | Cpn60_TCP1                | 21                               | 16                                 | 13                               | 12                                  | 16                                | 13                                       | 14                             | 15                                      | 19                                             | 13                                      | 15                            | 14                                    | 21                                      | 17                                   | 16                                        |
| PF00226           | DnaJ                      | 43                               | 50                                 | 43                               | 46                                  | 38                                | 40                                       | 36                             | 43                                      | 57                                             | 42                                      | 50                            | 41                                    | 48                                      | 48                                   | 55                                        |
| PF00012           | HSP70                     | 97                               | 105                                | 17                               | 9                                   | 37                                | 15                                       | 16                             | 13                                      | 42                                             | 19                                      | 15                            | 11                                    | 13                                      | 23                                   | 87                                        |
| PF00183           | HSP90                     | 5                                | 3                                  | 3                                | 3                                   | 4                                 | 3                                        | 60                             | 5                                       | 3                                              | 3                                       | 4                             | 5                                     | 4                                       | 4                                    | 3                                         |

Table S4. Numbers of genes containing functional domains related to non-self recognition and signaling. See also Figure 4a.

| Pfam accession | Pfam family identifier | <i>Pinctada fucata</i> | <i>Crassostrea gigas</i> | <i>Lottia gigantea</i> | <i>Helobdella robusta</i> | <i>Capitella teleta</i> | <i>Drosophila melanogaster</i> | <i>Daphnia pulex</i> | <i>Caenorhabditis elegans</i> | <i>Strongylocentrotus purpuratus</i> | <i>Branchiostoma floridae</i> | <i>Homo sapiens</i> | <i>Hydra magnipapillata</i> | <i>Nematostella vectensis</i> | <i>Acropora digitifera</i> | <i>Amphimedon queenslandica</i> |
|----------------|------------------------|------------------------|--------------------------|------------------------|---------------------------|-------------------------|--------------------------------|----------------------|-------------------------------|--------------------------------------|-------------------------------|---------------------|-----------------------------|-------------------------------|----------------------------|---------------------------------|
| PF00386        | C1q                    | 296                    | 335                      | 12                     | 10                        | 25                      | 1                              | 145                  | 0                             | 11                                   | 42                            | 33                  | 4                           | 3                             | 5                          | 0                               |
| PF00147        | Fibrinogen C           | 169                    | 202                      | 70                     | 116                       | 137                     | 14                             | 11                   | 7                             | 64                                   | 214                           | 26                  | 22                          | 128                           | 109                        | 211                             |
| PF00059        | Lectin C               | 334                    | 281                      | 130                    | 90                        | 207                     | 37                             | 52                   | 202                           | 147                                  | 645                           | 80                  | 73                          | 64                            | 99                         | 1                               |
| PF01582        | TIR                    | 125                    | 96                       | 71                     | 13                        | 84                      | 10                             | 8                    | 2                             | 243                                  | 85                            | 23                  | 6                           | 14                            | 36                         | 6                               |
| PF00531        | Death                  | 105                    | 52                       | 38                     | 19                        | 28                      | 6                              | 11                   | 10                            | 100                                  | 219                           | 33                  | 73                          | 20                            | 147                        | 271                             |
| PF00560        | LRR_1                  | 239                    | 180                      | 150                    | 107                       | 413                     | 101                            | 94                   | 71                            | 297                                  | 868                           | 230                 | 71                          | 161                           | 195                        | 128                             |
| PF00047        | ig                     | 173                    | 160                      | 144                    | 156                       | 142                     | 107                            | 133                  | 106                           | 145                                  | 278                           | 338                 | 75                          | 157                           | 328                        | 187                             |

Table S5. List of biomineralization-related genes tandemly arranged in the genome. See also Figure 5.

| scaffold | annotation        | localization<br>of the protein  | gene model ID<br>(ver. 2.0) | synonym in<br>gene model ver. 1.0 | BLASTP best hit against UniProtKB or NCBI nr                                 |           |           |
|----------|-------------------|---------------------------------|-----------------------------|-----------------------------------|------------------------------------------------------------------------------|-----------|-----------|
|          |                   |                                 |                             |                                   | description                                                                  | Accession | E-value   |
| 214      | nacrein           | nacre and prism <sup>a</sup>    | pfu_aug2.0_214.1_13802      | pfu_aug1.0_33972.1_19513          | Nacrein [ <i>Pinctada fucata</i> ]                                           | Q27908    | 0         |
|          | nacrein-like      | -                               | pfu_aug2.0_214.1_13803      | pfu_aug1.0_541.1_22209            | N66 matrix protein [ <i>P. maxima</i> ]                                      | Q9NL38    | 3.00E-69  |
| 2205     | MSI60             | nacre <sup>b</sup>              | pfu_aug2.0_2205.1_18728     | pfu_aug1.1_172742.1_80007         | insoluble protein (MSI60) [ <i>P. fucata</i> ] <sup>*</sup>                  | BAA20466  | 0         |
|          | MSI60-related     | -                               | pfu_aug2.0_2205.1_18729     | pfu_aug1.0_5926.1_52657           | MSI60-related protein [ <i>P. fucata</i> ] <sup>*</sup>                      | BAL42250  | 0         |
| 932      | N19-A             | nacre <sup>c</sup>              | pfu_aug2.0_932.1_08017      | pfu_aug1.0_16924.1_69026          | nacre protein (N19) [ <i>P. fucata</i> ] <sup>*</sup>                        | BAK57308  | 3.00E-135 |
|          | N19-B4            |                                 | pfu_aug2.0_932.1_08018      | pfu_aug1.0_2495.1_22993           | nacre protein (N19) [ <i>P. fucata</i> ] <sup>*</sup>                        | BAK57311  | 4.00E-137 |
|          | N19-B5            |                                 | pfu_aug2.0_932.1_08019      | pfu_aug1.0_172333.1_06741         | nacre protein (N19) [ <i>P. fucata</i> ] <sup>*</sup>                        | BAM77463  | 4.00E-98  |
| 1101     | Kunitz/BPTI SPI   | nacre <sup>d</sup>              | pfu_aug2.0_1101.1_04821     | pfu_aug1.0_24634.1_54990          | Carboxypeptidase inhibitor SmCI [ <i>Crassostrea gigas</i> ]                 | K1PX42    | 6.00E-47  |
|          | Kunitz/BPTI SPI   |                                 | pfu_aug2.0_1101.1_04822     | pfu_aug1.0_5601.1_16716           | BPTI/Kunitz domain-containing protein 2 [ <i>P. maxima</i> ]                 | P86963    | 3.00E-32  |
|          | Kunitz/BPTI SPI   |                                 | pfu_aug2.0_1101.1_04823     | pfu_aug1.0_12892.1_39408          | BPTI/Kunitz domain-containing protein 5 [ <i>P. margaritifera</i> ]          | H2A0P0    | 1.00E-82  |
|          | Kunitz/BPTI SPI   |                                 | pfu_aug2.0_1101.1_04824     | pfu_aug1.0_12892.1_39409          | Papilin [ <i>C. gigas</i> ]                                                  | K1Q4R7    | 2.00E-36  |
|          | Kunitz/BPTI SPI   |                                 | pfu_aug2.0_1101.1_04825     | pfu_aug1.0_12892.1_39410          | BPTI/Kunitz domain-containing protein 3 [ <i>P. margaritifera</i> ]          | H2A0N5    | 3.00E-107 |
| 2907     | Kunitz/BPTI SPI   | nacre <sup>d</sup>              | pfu_aug2.0_2907.1_25577     | pfu_aug1.0_876.1_36713            | BPTI/Kunitz domain-containing protein 4 [ <i>P. margaritifera</i> ]          | H2A0N9    | 2.00E-49  |
|          | Kunitz/BPTI SPI   |                                 | pfu_aug2.0_2907.1_25578     | pfu_aug1.0_876.1_36713            | BPTI/Kunitz domain-containing protein 4 [ <i>P. margaritifera</i> ]          | H2A0N9    | 1.00E-37  |
| 61       | shematrin-3       | (nacre and prism <sup>e</sup> ) | pfu_aug2.0_663.1_11057      | pfu_aug1.0_312495.1_50334         | Shematrin-3 [ <i>P. fucata</i> ] <sup>*</sup>                                | BAE93435  | 1.00E-49  |
|          | shematrin-1       |                                 | pfu_aug2.0_663.1_11058      | pfu_aug1.0_24266.1_33421          | Shematrin-1 [ <i>P. fucata</i> ] <sup>*</sup>                                | BAE93433  | 0         |
|          | shematrin-2       |                                 | pfu_aug2.0_663.1_11059      | pfu_aug1.0_89285.1_56763          | Shematrin-2 [ <i>P. fucata</i> ] <sup>*</sup>                                | BAE93434  | 0         |
| 2802     | shematrin-4B      | (nacre and prism <sup>e</sup> ) | pfu_aug2.0_2802.1_08985     | pfu_aug1.0_100445.1_49543         | Shematrin-4 [ <i>P. fucata</i> ] <sup>*</sup>                                | BAE93436  | 5.00E-40  |
|          | shematrin-4A      |                                 | pfu_aug2.0_2802.1_08986     | pfu_aug1.0_16186.1_10903          | Shematrin-4 [ <i>P. fucata</i> ] <sup>*</sup>                                | BAE93436  | 0         |
| 618      | alveolin-like     | prism <sup>d</sup>              | pfu_aug2.0_618.1_27594      | pfu_aug1.0_89.1_57967             | Valine-rich protein [ <i>P. maxima</i> ]                                     | P86947    | 2.00E-73  |
|          | MP10              |                                 | pfu_aug2.0_618.1_27595      | pfu_aug1.0_3035.1_59110           | Mantle protein [ <i>P. maxima</i> ]                                          | P86948    | 1.00E-53  |
| 6        | chitobiase-1      | prism <sup>d</sup>              | pfu_aug2.0_6.1_20027        | pfu_aug1.0_6745.1_67527           | Putative beta-hexosaminidase [ <i>P. margaritifera</i> ]                     | H2A0L6    | 1.00E-68  |
|          | chitobiase-2      |                                 | pfu_aug2.0_6.1_20028        | pfu_aug1.0_6745.1_67528           | Putative beta-hexosaminidase [ <i>P. margaritifera</i> ]                     | H2A0L6    | 0         |
| 194      | Clp-1             | prism <sup>d</sup>              | pfu_aug2.0_194.1_13762      | pfu_aug1.0_14887.1_32490          | Putative chitinase 1 [ <i>P. margaritifera</i> ]                             | H2A0L4    | 0         |
|          | Clp-3             |                                 | pfu_aug2.0_194.1_13763      | pfu_aug1.0_10761.1_31980          | Putative chitinase [ <i>P. maxima</i> ]                                      | P86955    | 0         |
| 2116     | EGF-like2A        | prism <sup>d</sup>              | pfu_aug2.0_2116.1_21942     | pfu_aug1.0_853.1_22356            | EGF-like domain containing protein 2 [ <i>P. margaritifera</i> ]             | H2A0L3    | 5.00E-141 |
|          | EGF-like2B        |                                 | pfu_aug2.0_2116.1_21943     | pfu_aug1.0_853.1_22358            | EGF-like domain-containing protein 2 [ <i>P. maxima</i> ]                    | P86954    | 2.00E-88  |
| 429      | fibronectin-2     | prism <sup>d</sup>              | pfu_aug2.0_429.1_30750      | pfu_aug1.0_13143.1_39453          | Fibronectin type III domain-containing protein 2 [ <i>P. margaritifera</i> ] | H2A0L8    | 5.00E-172 |
|          | fibronectin-1A    |                                 | pfu_aug2.0_429.1_30751      | pfu_aug1.0_9430.1_38910           | Fibronectin type III domain-containing protein 1 [ <i>P. margaritifera</i> ] | H2A0L7    | 5.00E-75  |
|          | fibronectin-1B    |                                 | pfu_aug2.0_429.1_30752      | pfu_aug1.0_6844.1_09446           | Fibronectin type III domain-containing protein 1 [ <i>P. margaritifera</i> ] | H2A0L7    | 0         |
| 465      | peroxidase-like-1 | prism <sup>d</sup>              | pfu_aug2.0_465.1_17456      | pfu_aug1.0_6329.1_09321           | Peroxidase-like protein [ <i>P. margaritifera</i> ]                          | H2A0M7    | 0         |
|          | peroxidase-like-2 |                                 | pfu_aug2.0_465.1_17457      | pfu_aug1.0_32945.1_48096          | Peroxidase-like protein [ <i>P. margaritifera</i> ]                          | H2A0M7    | 1.00E-126 |
|          | peroxidase-like-3 |                                 | pfu_aug2.0_465.1_17458      | pfu_aug1.0_32945.1_48096          | Peroxidase-like protein [ <i>P. margaritifera</i> ]                          | H2A0M7    | 0         |
|          | peroxidase-like-4 |                                 | pfu_aug2.0_465.1_17459      | pfu_aug1.0_33687.1_48123          | Peroxidase-like protein [ <i>P. margaritifera</i> ]                          | H2A0M7    | 0         |
|          | peroxidase-like-5 |                                 | pfu_aug2.0_465.1_17461      | pfu_aug1.0_1885.1_51458           | Peroxidase-like protein [ <i>P. margaritifera</i> ]                          | H2A0M7    | 5.00E-163 |
|          | peroxidase-like-6 |                                 | pfu_aug2.0_465.1_17462      | pfu_aug1.0_11935.1_03146          | Peroxidase-like protein [ <i>P. margaritifera</i> ]                          | H2A0M7    | 0         |
| 242      | tyrosinase1A      | prism <sup>d</sup>              | pfu_aug2.0_242.1_07222      | pfu_aug1.0_10251.1_39018          | Tyrosinase-like protein 1 [ <i>P. margaritifera</i> ]                        | H2A0L0    | 8.00E-169 |
|          | tyrosinase1B      |                                 | pfu_aug2.0_242.1_07224      | pfu_aug1.0_10251.1_39018          | Tyrosinase-like protein 1 [ <i>P. margaritifera</i> ]                        | H2A0L0    | 1.00E-165 |

<sup>a</sup> Miyamoto *et al.* (1996)<sup>[59]</sup><sup>b</sup> Sudo *et al.* (1997)<sup>[60]</sup><sup>c</sup> Yano *et al.* (2007)<sup>[58]</sup><sup>d</sup> Marie *et al.* (2012)<sup>[10]</sup><sup>e</sup> Localization is inferred based on the gene expression analysis of Yano *et al.* (2006)<sup>[57]</sup>

\* BLASTP best hit against NCBI non-redundant database

Table S6. Hox and neighboring gene models tandemly arranged in the genome. See also Figure 6a.

| scaffold ID | gene annotation | gene model ID (ver 2.0) | synonym in gene model ver 1.0 | BLAST best hit against UniProtKB                                |                                                                         |          | BLAST best hit against <i>L. gigantea</i> gene model |            |          | BLAST best hit against <i>C. gigas</i> gene model |              |              |              |              |           |
|-------------|-----------------|-------------------------|-------------------------------|-----------------------------------------------------------------|-------------------------------------------------------------------------|----------|------------------------------------------------------|------------|----------|---------------------------------------------------|--------------|--------------|--------------|--------------|-----------|
|             |                 |                         |                               | description                                                     | Accession                                                               | E-value  | scaffold ID                                          | protein ID | E-value  | scaffold ID                                       | protein ID   | E-value      |              |              |           |
| 73          | Hox1            | pfu aug2.0 73.1 10231   | pfu aug1.0 2046.1 29956       | Homeobox protein Hox-A1 [ <i>Heterodontus francisci</i> ]       | Q9IA19                                                                  | 6.00E-24 | 12                                                   | 100648     | 2.56E-23 | 801                                               | CGI 10024084 | 1.00E-64     |              |              |           |
|             | Hox2            | pfu aug2.0 73.1 10230   | pfu aug1.1 7850.1 80176       | Homeobox protein Hox-A2 [ <i>Bos taurus</i> ]                   | Q0VCS4                                                                  | 1.00E-45 |                                                      | 110623     | 2.01E-29 |                                                   | CGI 10024086 | 1.00E-92     |              |              |           |
|             | Hox3            | pfu aug2.0 73.1 10229   | pfu aug1.1 3384.1 80162       | Homeobox protein HOX3 [ <i>Branchiostoma floridae</i> ]         | P50901                                                                  | 1.00E-35 |                                                      | 56601      | 1.38E-27 |                                                   | CGI 10024087 | 3.30E-90     |              |              |           |
|             | Hox4            | pfu aug2.0 73.1 10225   | pfu aug1.1 103000.1 80163     | Homeobox protein Hox-B4a [ <i>Danio rerio</i> ]                 | P22574                                                                  | 1.00E-49 |                                                      | 110972     | 3.43E-44 |                                                   | CGI 10024091 | 1.00E-105    |              |              |           |
|             | Hox5            | pfu aug2.0 73.1 10224   | pfu aug1.1 9342.1 80178       | Homeobox protein Hox-B5b [ <i>Takifugu rubripes</i> ]           | Q1KXX0                                                                  | 3.00E-36 |                                                      | 86927      | 5.08E-60 |                                                   | CGI 10024092 | 2.00E-54     |              |              |           |
| -           | -               | pfu aug2.0 73.1 10223   | pfu aug1.0 14207.1 54039      | -                                                               | -                                                                       | -        | -                                                    | -          | -        | 1206                                              | CGI 10002107 | 7.00E-08     |              |              |           |
| -           | -               | pfu aug2.0 73.1 10222   | pfu aug1.0 7484.1 09580       | -                                                               | -                                                                       | -        | -                                                    | -          | -        | 1359                                              | CGI 10013240 | 4.00E-09     |              |              |           |
| 126         | Lox5            | pfu aug2.0 126.1 20292  | pfu aug1.1 422.1 80164        | Lox5 hox protein [ <i>Capitella teleta</i> ]                    | B6RFX8                                                                  | 8.00E-44 | 12                                                   | 89598      | 5.47E-32 | 145                                               | CGI 10026565 | 7.00E-74     |              |              |           |
|             | Amp             | pfu aug2.0 126.1 20291  | pfu aug1.0 422.1 43655        | Homeobox protein Hox-A7 [ <i>Heterodontus francisci</i> ]       | Q9IA25                                                                  | 3.00E-28 |                                                      | 177860     | 1.31E-32 |                                                   | CGI 10026565 | 3.00E-25     |              |              |           |
|             | Lox4            | pfu aug2.0 126.1 20290  | pfu aug1.1 5652.1 80179       | Lox4 hox protein [ <i>Capitella teleta</i> ]                    | B6RFX9                                                                  | 8.00E-50 |                                                      | 185752     | 4.63E-45 |                                                   | CGI 10026562 | 1.00E-108    |              |              |           |
|             | -               | -                       | pfu aug2.0 126.1 20289        | pfu aug1.0 24639.1 40507                                        | -                                                                       | -        |                                                      | -          | -        |                                                   | -            | 37500        | CGI 10002382 | 2.00E-07     |           |
|             | -               | -                       | pfu aug2.0 126.1 20288        | pfu aug1.0 1480.1 22604                                         | Enteropeptidase [ <i>Bos taurus</i> ]                                   | P98072   |                                                      | 6.00E-36   | 238      |                                                   | 175076       | 4.23E-38     | 86           | CGI 10028222 | 2.00E-92  |
|             | -               | -                       | pfu aug2.0 126.1 20287        | pfu aug1.0 1480.1 22604                                         | -                                                                       | -        |                                                      | -          | 41       |                                                   | 122611       | 1.89E-44     | 317          | CGI 10019362 | 5.00E-69  |
|             | -               | -                       | pfu aug2.0 126.1 20286        | pfu aug1.0 144891.1 49906                                       | Mannosyl-oligosaccharide 1,2-alpha-mannosidase IA [ <i>Sus scrofa</i> ] | O02773   |                                                      | 4.00E-97   | 84       |                                                   | 222667       | 3.73E-174    | 43842        | CGI 10013108 | 1.00E-120 |
|             | -               | -                       | pfu aug2.0 126.1 20285        | -                                                               | Insulin-like growth factor I [ <i>Oryctolagus cuniculus</i> ]           | Q95222   |                                                      | 4.00E-07   | -        |                                                   | -            | -            | -            | -            | -         |
|             | -               | -                       | pfu aug2.0 126.1 20284        | pfu aug1.0 653.1 07611                                          | -                                                                       | -        |                                                      | -          | 31       |                                                   | 161981       | 9.24E-28     | 33704        | CGI 10001119 | 4.00E-29  |
|             | -               | -                       | pfu aug2.0 126.1 20283        | pfu aug1.0 653.1 07610                                          | -                                                                       | -        |                                                      | -          | -        |                                                   | -            | -            | -            | -            | -         |
| 93          | Lox2            | pfu aug2.0 93.1 10254   | pfu aug1.1 1857.1 80165       | Homeobox protein LOX2 [ <i>Crassostrea gigas</i> ]              | K1RXD0                                                                  | 8.00E-58 | 12                                                   | 156932     | 1.65E-24 | 247                                               | CGI 10018592 | 7.00E-50     |              |              |           |
|             | Post2           | pfu aug2.0 93.1 10256   | pfu aug1.0 3017.1 01301       | Homeobox protein abdominal-B [ <i>Drosophila melanogaster</i> ] | P09087                                                                  | 9.00E-19 |                                                      | 89720      | 4.03E-40 |                                                   | CGI 10027388 | 1.00E-114    |              |              |           |
|             | Post1           | pfu aug2.0 93.1 10258   | pfu aug1.0 19935.1 33056      | Homeobox protein Hox-C11 [ <i>Homo sapiens</i> ]                | O43248                                                                  | 2.00E-17 |                                                      | 100031     | 8.46E-37 |                                                   | CGI 10027385 | 1.00E-44     |              |              |           |
|             | -               | -                       | pfu aug2.0 93.1 10259         | pfu aug1.0 518.1 15112                                          | -                                                                       | -        |                                                      | -          | -        |                                                   | -            | 198          | CGI 10027798 | 3.00E-16     |           |
|             | -               | -                       | pfu aug2.0 93.1 10261         | pfu aug1.0 4446.1 52277                                         | -                                                                       | -        |                                                      | -          | -        |                                                   | -            | 22           | CGI 10028832 | 4.00E-08     |           |
|             | -               | -                       | pfu aug2.0 93.1 10262         | pfu aug1.0 4446.1 52276                                         | Coatamer subunit zeta-1 [ <i>Bos taurus</i> ]                           | P35604   |                                                      | 4.00E-82   | 156936   |                                                   | 7.00E-106    | CGI 10027384 | 4.00E-104    |              |           |
|             | -               | -                       | pfu aug2.0 93.1 10263         | pfu aug1.0 16642.1 61633                                        | SWI/SNF complex subunit SMARCC2 [ <i>Homo sapiens</i> ]                 | Q8TAQ2   |                                                      | 0          | 177862   |                                                   | 0            | CGI 10027383 | 3.00E-06     |              |           |
|             | -               | -                       | -                             | -                                                               | -                                                                       | -        |                                                      | -          | -        |                                                   | -            | -            | -            | -            | -         |
|             | -               | -                       | -                             | -                                                               | -                                                                       | -        |                                                      | -          | -        |                                                   | -            | -            | -            | -            | -         |

Shaded scaffolds contain Hox genes.

Table S7. ParaHox and neighboring gene models tandemly arranged in the genome. See also Figure 6b.

| scaffold ID | gene annotation | gene model ID (ver. 2.0) | synonym in gene model ver 1.0 | BLAST best hit against UniProtKB                                        |            |           | BLAST best hit against <i>L. gigantea</i> gene model |            |           | BLAST best hit against <i>C. gigas</i> gene model |              |           |
|-------------|-----------------|--------------------------|-------------------------------|-------------------------------------------------------------------------|------------|-----------|------------------------------------------------------|------------|-----------|---------------------------------------------------|--------------|-----------|
|             |                 |                          |                               | description                                                             | Accession  | E-value   | scaffold ID                                          | protein ID | E-value   | scaffold ID                                       | protein ID   | E-value   |
| 446         | -               | pfu aug2.0 446.1 20790   | pfu aug1.0 26346.1 62427      | Armadillo repeat-containing protein 3 [ <i>Homo sapiens</i> ]           | Q5W041     | 5.00E-160 | 13                                                   | 111572     | 2.00E-142 | 1901                                              | CGI_10015552 | 0         |
|             | -               | pfu aug2.0 446.1 20789   | pfu aug1.0 1405.1 37001       | Glutamate receptor ionotropic, kainate 3 [ <i>Macaca fascicularis</i> ] | Q38PU2     | 3.00E-08  | 36                                                   | 233226     | 7.00E-11  | 1901                                              | CGI_10015551 | 8.00E-38  |
|             | -               | pfu aug2.0 446.1 20788   | pfu aug1.0 18127.1 03895      | Glutamate receptor ionotropic, kainate 3 [ <i>Homo sapiens</i> ]        | Q13003     | 5.00E-66  | 13                                                   | 111532     | 6.00E-106 | 1901                                              | CGI_10015550 | 0         |
|             | -               | pfu aug2.0 446.1 20787   | pfu aug1.0 12412.1 46500      | Glutamate receptor ionotropic, kainate 2 [ <i>Homo sapiens</i> ]        | Q13002     | 8.00E-78  | 13                                                   | 111488     | 0         | 1901                                              | CGI_10015549 | 0         |
|             | Gsx             | pfu aug2.0 446.1 20786   | pfu aug1.0 72505.1 41946      | GS homeobox 1 [ <i>Homo sapiens</i> ]                                   | Q9H4S2     | 8.00E-28  | 80                                                   | 99857      | 1.99E-30  | 1901                                              | CGI_10015548 | 4.00E-62  |
|             | -               | pfu aug2.0 446.1 20785   | pfu aug1.0 17408.1 39942      | -                                                                       | -          | -         | 12                                                   | 159233     | 1.04E-34  | 1901                                              | CGI_10015546 | 3.00E-62  |
|             | Xlox            | pfu aug2.0 446.1 20784   | pfu aug1.0 17408.1 39943      | ParaHox homeotic protein xLox [ <i>Sepia officinalis</i> ]              | A0A023UHY1 | 4.00E-48  | 80                                                   | 100678     | 1.70E-38  | 1901                                              | CGI_10015546 | 1.00E-52  |
|             | -               | pfu aug2.0 446.1 20783   | pfu aug1.0 342779.1 28872     | -                                                                       | -          | -         | -                                                    | 236400     | 1.52E-10  | -                                                 | -            | -         |
|             | Cdx             | pfu aug2.0 446.1 20781   | pfu aug1.0 6325.1 59995       | Homeotic protein caudal [ <i>Drosophila melanogaster</i> ]              | P09085     | 1.00E-35  | 85                                                   | 197335     | 3.70E-42  | 348                                               | CGI_10023003 | 1.00E-113 |

Shaded scaffolds contain ParaHox genes.

Table S8. Wnt and adjacent gene models tandemly arranged in the genome. See also Figure 6c.

| scaffold ID | gene annotation | gene model ID (ver. 2.0) | synonym in gene model ver 1.0 | BLASTP best hit against UniProtKB        |           |           | BLASTP best hit against <i>L. gigantea</i> gene model |            |           | BLASTP best hit against <i>C. gigas</i> gene model |              |           |
|-------------|-----------------|--------------------------|-------------------------------|------------------------------------------|-----------|-----------|-------------------------------------------------------|------------|-----------|----------------------------------------------------|--------------|-----------|
|             |                 |                          |                               | description                              | Accession | E-value   | scaffold ID                                           | protein ID | E-value   | scaffold ID                                        | protein ID   | E-value   |
| 277         | wnt9            | pfu_aug2.0_277.1_23797   | pfu_aug1.0_189.1_36368        | Protein Wnt-9a [ <i>Gallus gallus</i> ]  | O42280    | 3.00E-110 | 107                                                   | 180028     | 7.83E-145 | 825                                                | CGI_10012717 | 7.00E-66  |
|             | wnt1            | pfu_aug2.0_277.1_23796   | pfu_aug1.0_11928.1_60961      | Protein Wnt-1 [ <i>Bombyx mori</i> ]     | P49340    | 1.00E-33  |                                                       | 170942     | 7.00E-86  |                                                    | CGI_10017080 | 3.00E-50  |
|             | wnt6            | pfu_aug2.0_277.1_23794   | pfu_aug1.0_39331.1_62990      | Protein Wnt-6 [ <i>Homo sapiens</i> ]    | Q9Y6F9    | 4.00E-73  |                                                       | 136505     | 2.30E-133 | 747                                                | CGI_10017079 | 1.00E-116 |
|             | wnt10           | pfu_aug2.0_277.1_23793   | pfu_aug1.0_16143.1_54282      | Protein Wnt [ <i>Crassostrea gigas</i> ] | K1Q987    | 1.00E-139 |                                                       | 136550     | 3.70E-64  |                                                    | CGI_10017078 | 1.00E-115 |
